# Supplementary material for: Improving field emission by constructing CsI–AlN hybrid nanostructures
Source: Royal Society of Chemistry journal article supplement (doi:10.1039/c2jm33532h), 2012-01-01
Supplement: c2jm33532h.pdf [file c2jm33532h.pdf]

## Electronic Supplementary Information

### Improving field emission by constructing CsI-AlN hybrid nanostructures

Weijin Qian, Hongwei Lai, Xiaozhu Pei, Jiao Jiang, Qiang Wu,\* Yongliang Zhang, Xizhang Wang, and Zheng Hu

Key Laboratory of Mesoscopic Chemistry of MOE, School of Chemistry and Chemical Engineering, Nanjing University, Nanjing, 210093 (China)

E-mail: wqchem@nju.edu.cn and zhenghu@nju.edu.cn.

#### Index

SI-1. Setup for CsI evaporation

SI-2. XRD patterns, EDS spectra and SEM characterization of the samples

SI-3. (HR)TEM characterization on the CsI-AlN-8 sample

SI-4.  $E_{to}$  and  $E_{thr}$  of the patterned and unpatterned CsI-AlN-6 nanostructures

SI-5. Comparison of  $E_{to}$  and  $E_{thr}$  between CsI-AlN-6 and some other nanostructures

SI-6. XPS spectra of the hybrid samples before and after field emission measurement

#### Reference

### SI-1. Setup for CsI evaporation

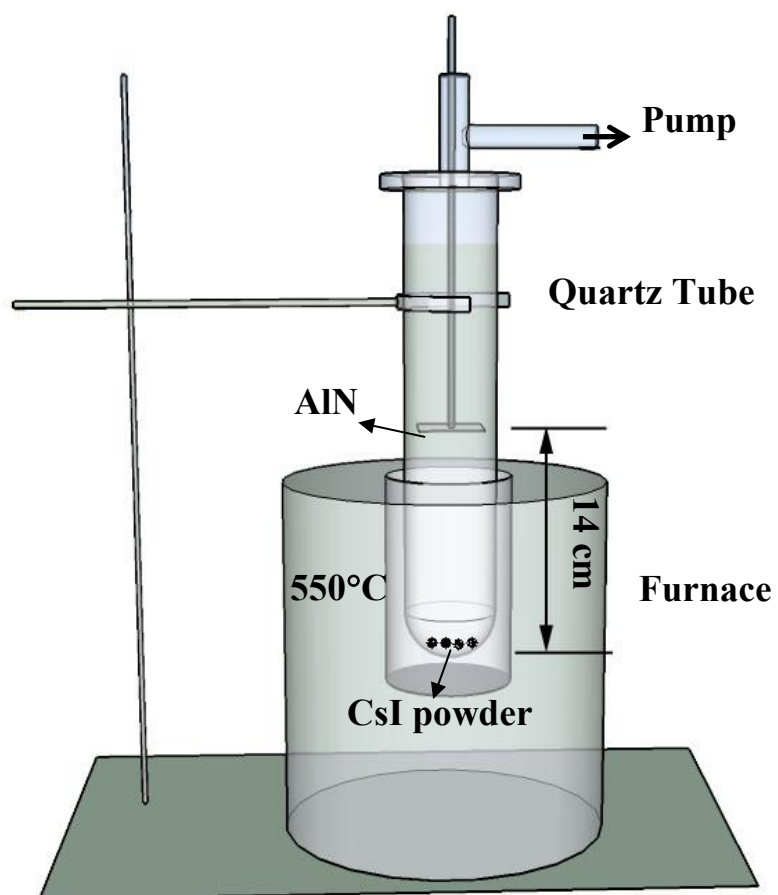

**Fig. S1** Setup for CsI evaporation.

## SI-2. XRD patterns, EDS spectra and SEM characterization of the samples

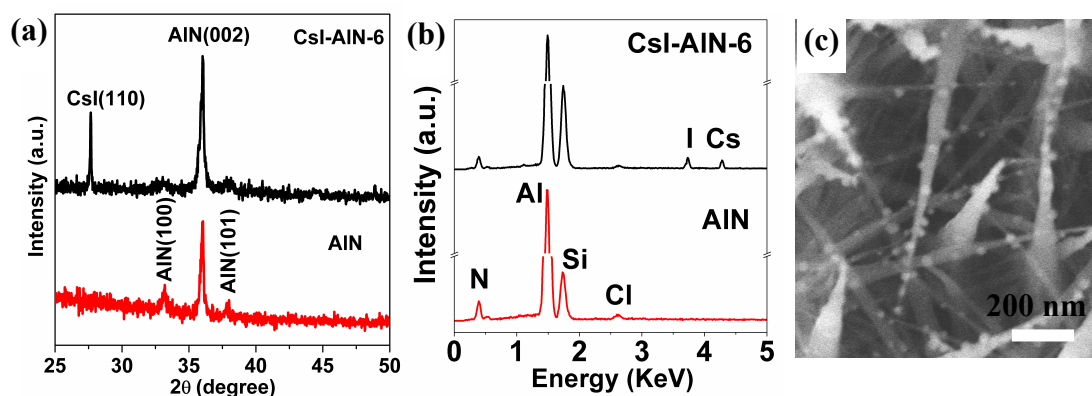

**Fig. S2** XRD patterns (a) and EDS spectra (b) of the pristine AlN nanocones and CsI-AlN-6 nanostructures. (c) SEM images of CsI-AlN-6 nanostructures. This area corresponds to the EDS spectrum of CsI-AlN-6 in (b).

It is seen that the pristine nanocones is composed of hexagonal AlN with the preferential growth direction of [001]. EDS spectrum shows the signals of Al and N from AlN, as well as Si signal from the substrate and Cl from surface adsorption. For CsI-AlN-6, many nanoparticles are attached on the surface of the AlN nanocones. The corresponding XRD and EDS results reveal that the nanoparticles are CsI.

### SI-3. (HR)TEM characterization on the CsI-AIN-8 sample

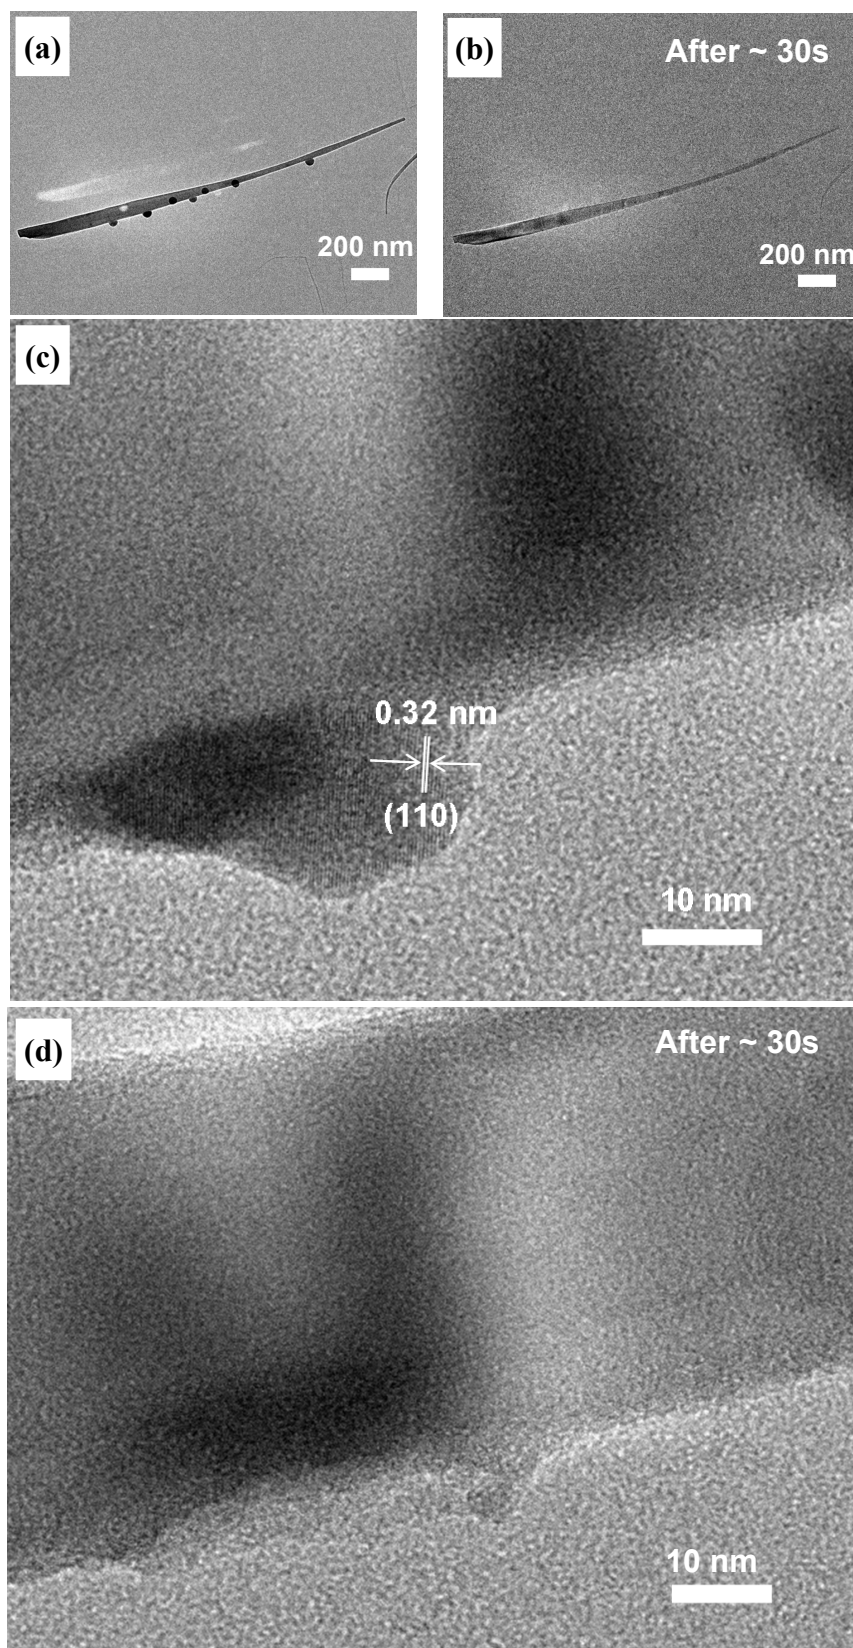

**Fig. S3** TEM (a-b) and HRTEM (c-d) images of the CsI-AIN-8 sample. Note: the images in (b) and (d) correspond to the nanostructures after ~30 s (HR)TEM observation. It is seen the CsI nanoparticles were tightly adhered on the surface of the AlN nanocones, which would be evaporated due to the high energy electron beam irradiation.

SI-4.  $E_{to}$  and  $E_{thr}$  of the patterned and unpatterned CsI-AlN-6 nanostructures

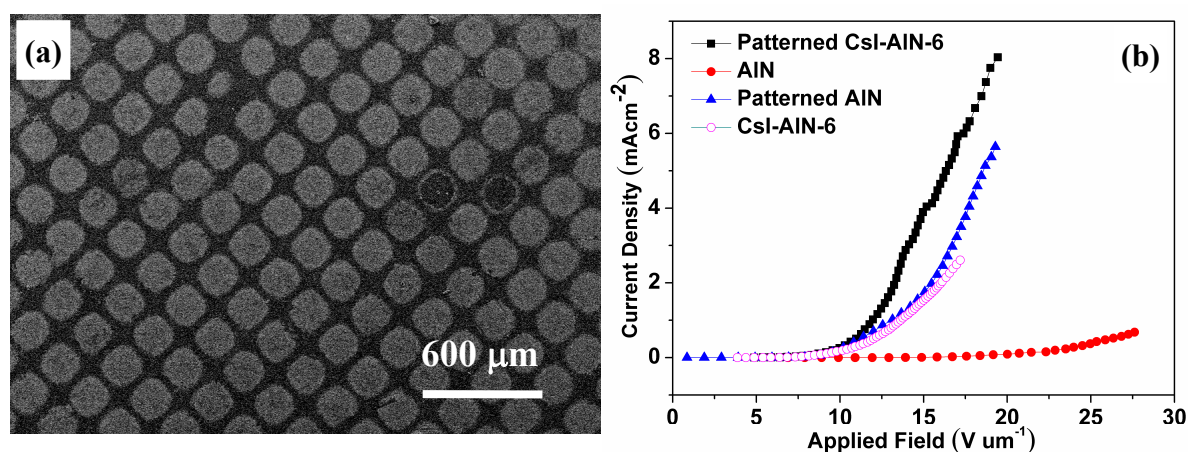

**Fig. S4** SEM image (a) and J-E curves (b) of the patterned CsI-AlN-6 nanostructure. Note: the J-E curves of the pristine AlN, patterned AlN, and CsI-AlN-6 samples are also shown in (b) for comparison.

**Table S1.**  $E_{to}$  and  $E_{thr}$  of the patterned and unpatterned CsI-AlN-6 nanostructure

| Sample                  | $E_{to}$ ( $V \mu m^{-1}$ ) | $E_{thr}$ ( $V \mu m^{-1}$ ) | Note                 |
|-------------------------|-----------------------------|------------------------------|----------------------|
| AlN nanocones           | 15.2                        | >30                          | this work            |
| Patterned AlN nanocones | 7.7                         | 13.1                         | Ref. 3 of this paper |
| CsI-AlN-6               | 7.0                         | 13.6                         | this work            |
| Patterned CsI-AlN-6     | 6.6                         | 11.8                         | this work*           |

\*The field emission property of the patterned CsI-AlN-6 nanostructure is better than the unpatterned one due to the decreased screening effect.

SI-5. Comparison of  $E_{to}$  and  $E_{thr}$  between CsI-AlN-6 and some other nanostructures

**Table S2.**  $E_{to}$  and  $E_{thr}$  of some nanostructures

| Sample                  | $E_{to}$ ( $V \mu m^{-1}$ ) | $E_{thr}$ ( $V \mu m^{-1}$ )   | Note                  |
|-------------------------|-----------------------------|--------------------------------|-----------------------|
| WO <sub>3</sub>         | 1.8                         | 3.3                            | Ref. 31 of this paper |
| CdS                     | 3.7                         | 9.3                            | Ref. 32 of this paper |
| ZnS                     | 3.69                        | /                              | Ref. 33 of this paper |
| Patterned AlN nanocones | 4.8/7.7                     | 11.2/13.1                      | Ref. 3 of this paper  |
| Si-doped AlN            | 1.8                         | 4.6 at $10 \text{ mA cm}^{-2}$ | Ref. 17 of this paper |
| CsI-AlN-6               | 7.0                         | 13.6                           | this work             |

$E_{to}$  and  $E_{thr}$  correspond to the electric field to generate an emission current density of  $10 \mu A \text{ cm}^{-2}$  and  $1 \text{ mA cm}^{-2}$ , respectively.

SI-6. XPS spectra of the hybrid samples before and after field emission measurement

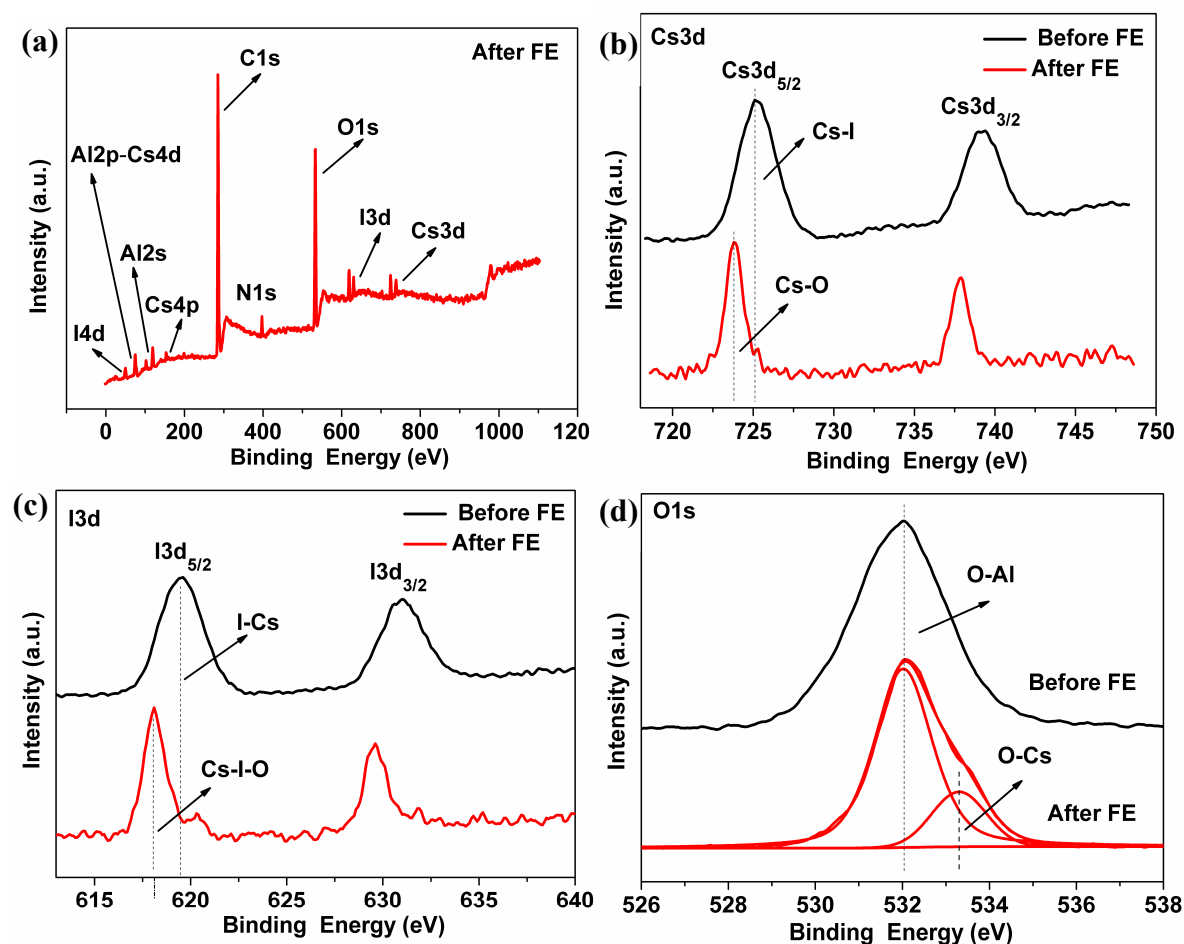

**Fig. S5** XPS spectra of the CsI-AlN-6 hybrid samples before and after field emission (FE) measurement. (a) survey; (b) Cs3d; (c) I3d; (d) O1s.

Note: The binding energies for the marked species are about 723.8 and 725.1 eV for Cs-O<sup>1</sup> and Cs-I in (b), 619.5 and 618.2 eV for I-Cs and Cs-I-O<sup>2,3</sup> in (c), 532.0 and 533.3 eV for O-Al and O-Cs in (d). It is noticed that both Cs3d and I3d signals shift to the low binding energy side for about 1.3 eV after FE.

**Reference**

- 1 E. A. Podgornov, I. P. Prosvirin and V. I. Bukhtiyarov, *J. Mol. Catal. A: Chem.*, 2000, **158**, 337–343.
- 2 L. F. Drummy, S. Apt, D. Shiffler, K. Golby, M. LaCour, B. Maruyama and R. A. Vaia, *J. Appl. Phys.*, 2010, **107**, 113304.
- 3 V. Vlahos, D. Morgan, M. LaCour, K. Golby, D. Shiffler and J. H. Booske, *J. Appl. Phys.* 2010, **107**, 044903.
